# Supplementary material for: ZnO nanoparticle-modified polymethyl methacrylate-assisted dispersive liquid–liquid microextraction coupled with MALDI-MS for rapid pathogenic bacteria analysis
Source: Royal Society of Chemistry journal article supplement (doi:10.1039/c4ra03391d), 2014-01-01
Supplement: c4ra03391d1.pdf [file c4ra03391d1.pdf]

## Supporting Figures

**Fig. S1A** Schematic presentation of COO<sup>-</sup> groups in PMMA chemisorbed on ZnO nanoparticles particles by hydrolysis of the ester group of PMMA.

**Fig. S2.** Effect of the absorbent (ZnO@PMMA) on the separation using (a) 0.05, (b) 0.1, (c) 0.2, and (d) 0.5 mg/mL (e) 1.0 mg/mL

**Fig. S3** Comparing the ZnO@PMMA-DLLME the present and absence of bacteria in water. (a) without any bacteria (b) *S. aureus* (d) *P. aeruginosa*

**Fig. S4** Method for limit of detection of *S. aureus* with ZnONPs@PMMA -DLLME (a)  $4.8 \times 10^8$  (b)  $9.7 \times 10^6$  (c)  $3.2 \times 10^5$  (d)  $1.8 \times 10^4$  (e)  $9.7 \times 10^3$  and (f)  $8.9 \times 10^2$  cfu/mL.

**Fig. S5** Method for limit of detection of *P. aeruginosa* with ZnONPs@PMMA-DLLME (a)  $6.2 \times 10^8$  (b)  $4.5 \times 10^7$  (c)  $1.2 \times 10^6$  (d)  $3.2 \times 10^5$  (e)  $1.7 \times 10^4$  and (f)  $3.8 \times 10^3$  cfu/mL.

**Fig.S1**

Fig.S2A

(a)

(b)

(c)

(d)

(e)

Fig.S2B

(a)

(b)

(c)

(d)

(e)

**Fig.S3**

**Absolute intensity**

**Fig.S4**

**x**

**(a)**

**x**

**(b)**

**Absolute intensity**  
**x**

**(c)**

**x**

**(d)**

**x**

**(e)**

**x**

**(f)**

**Fig.S5**

**Absolute intensity**

**(a)**

**(b)**

**(c)**

**(d)**

**(e)**

**(f)**
